# Supplementary material for: Synthesis and evaluation of caged Garcinia xanthones
Source: Royal Society of Chemistry journal article supplement (doi:10.1039/b612903j), 2006-12-20

# Synthesis and Evaluation of Caged *Garcinia* Xanthones

Ayse Batova<sup>b</sup>, Thanh Lam,<sup>a</sup> Veit Wascholowski,<sup>c</sup> Alice L. Yu<sup>b</sup> Athanassios Giannis,<sup>c\*</sup>  
and Emmanuel A. Theodorakis<sup>a\*</sup>

## Supplementary Information

|                                                                                                                          |               |
|--------------------------------------------------------------------------------------------------------------------------|---------------|
| NMR spectra of compounds <b>10</b> , <b>11</b> , <b>14</b> , <b>15</b> , <b>17</b> , <b>18</b> , <b>21</b> and <b>22</b> | Pages<br>2-16 |
|--------------------------------------------------------------------------------------------------------------------------|---------------|

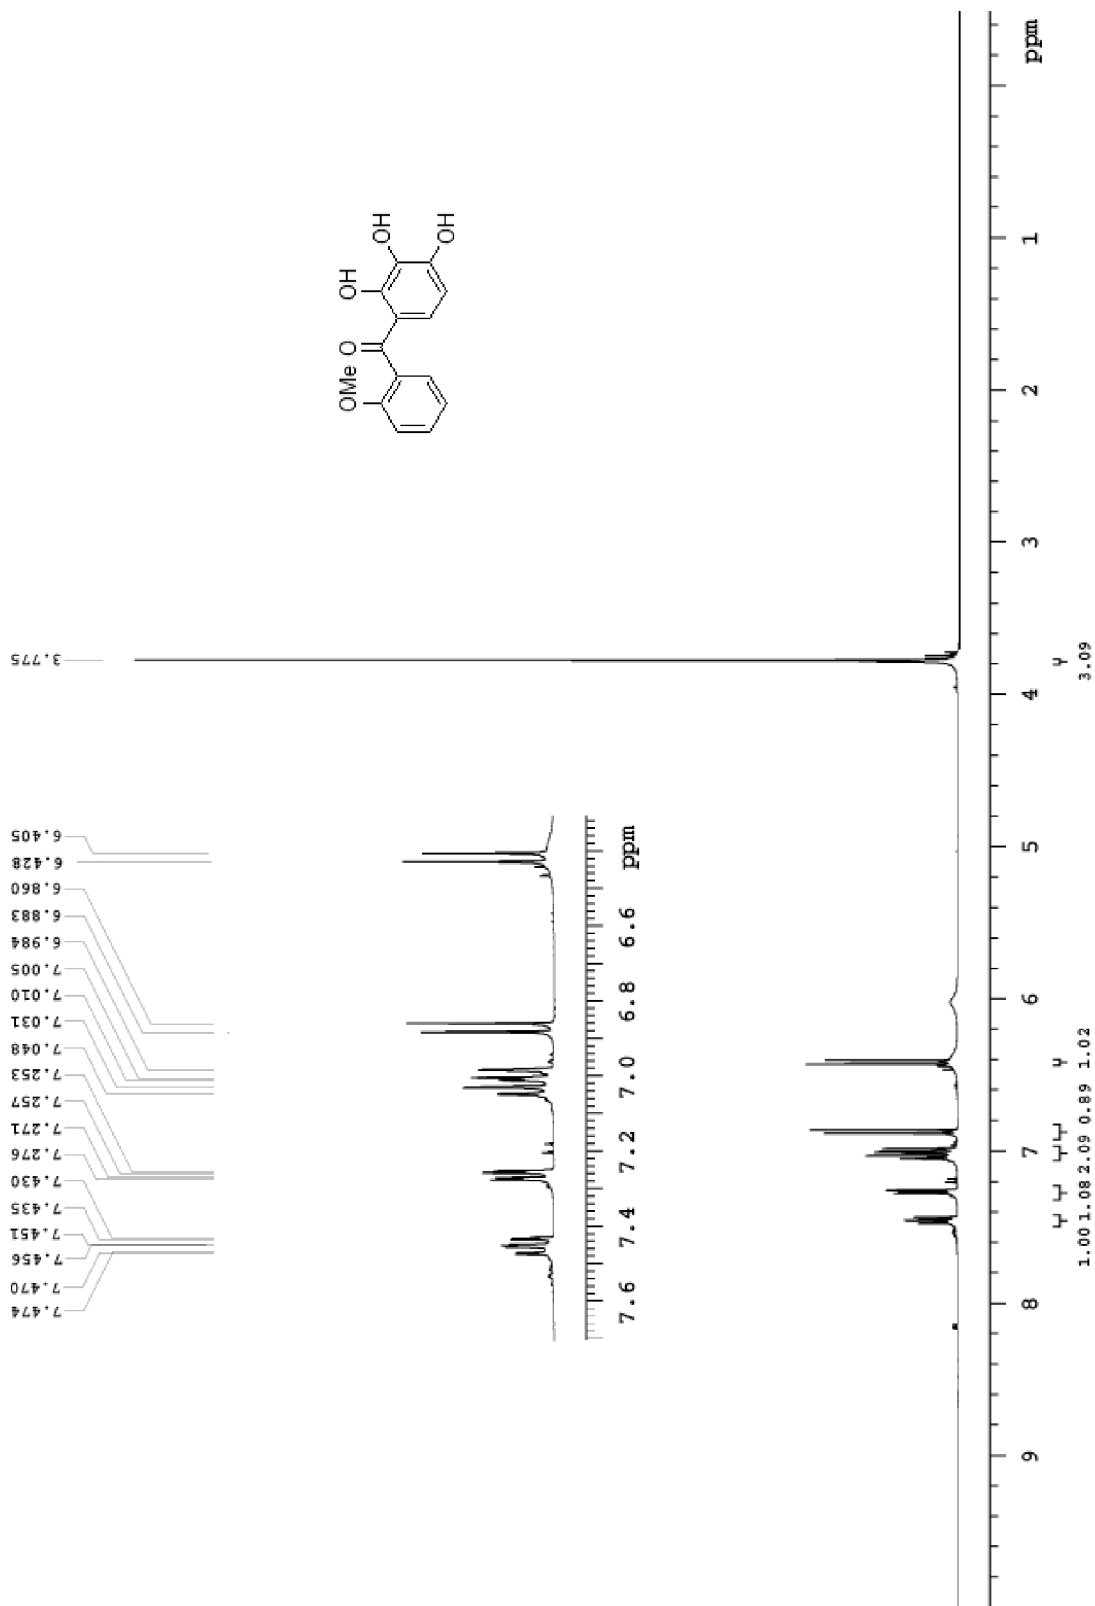

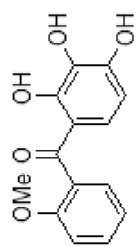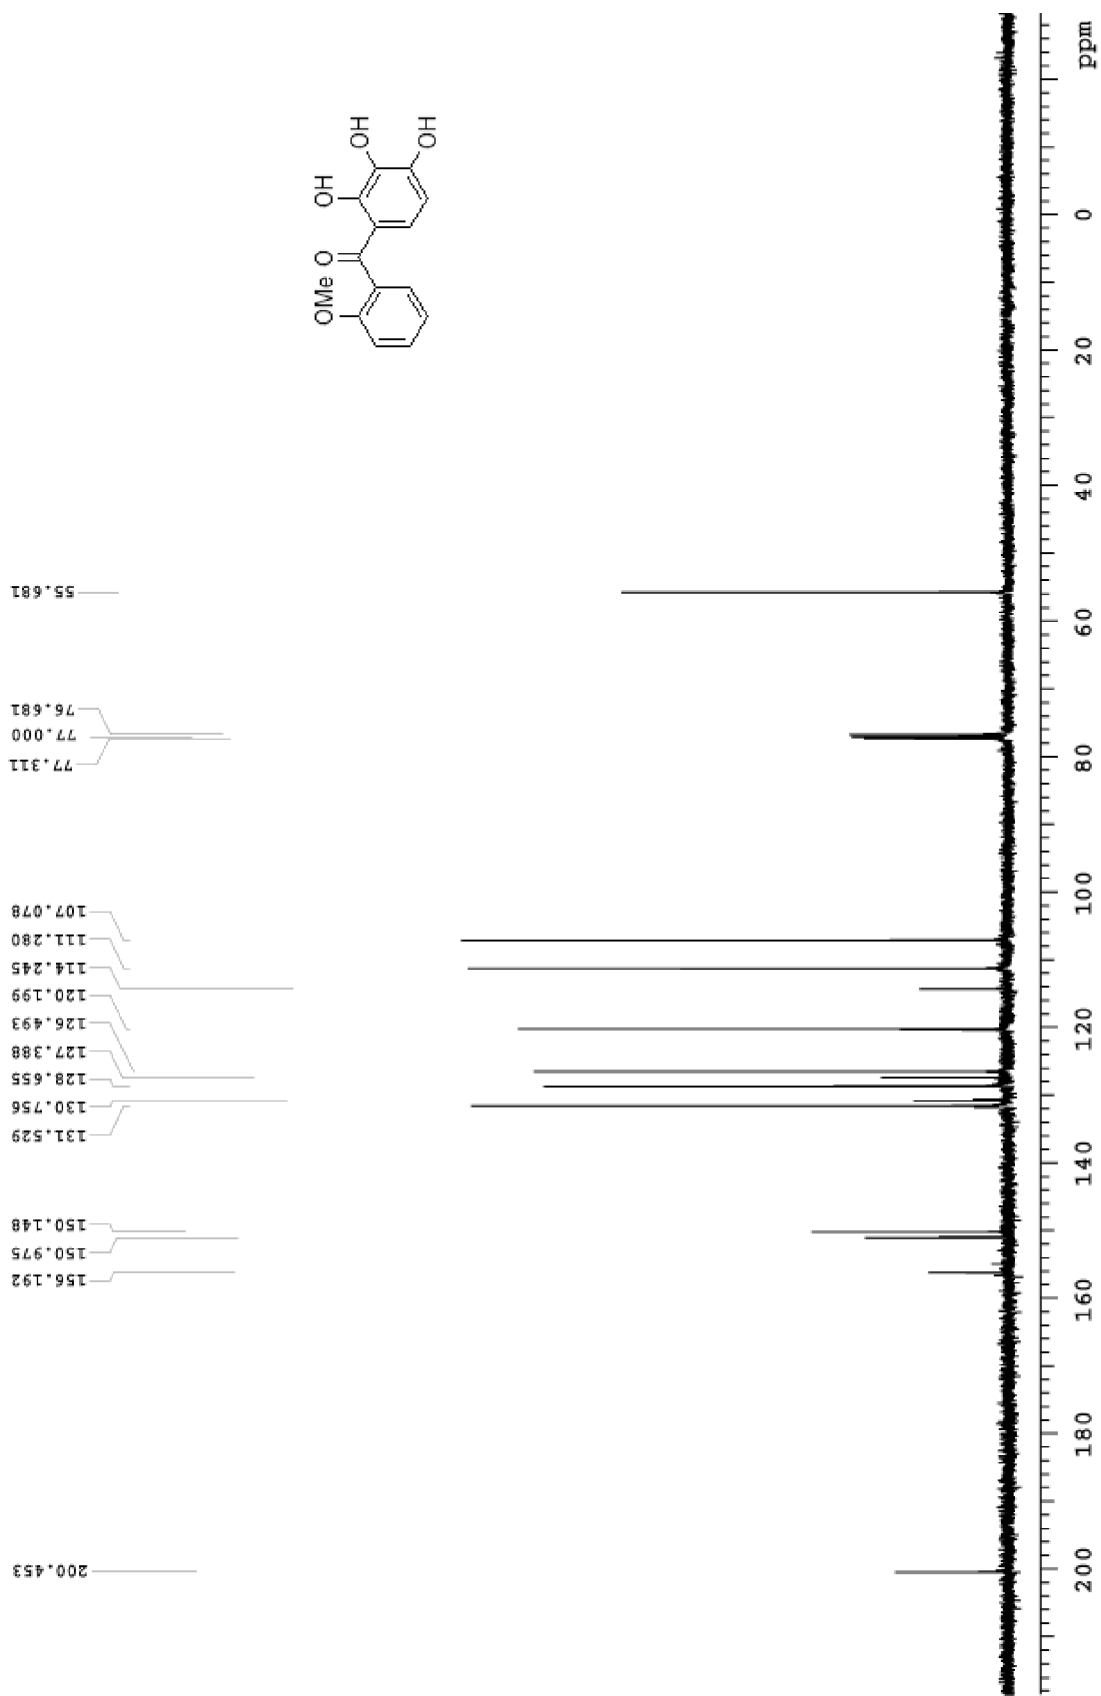

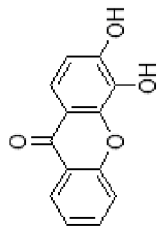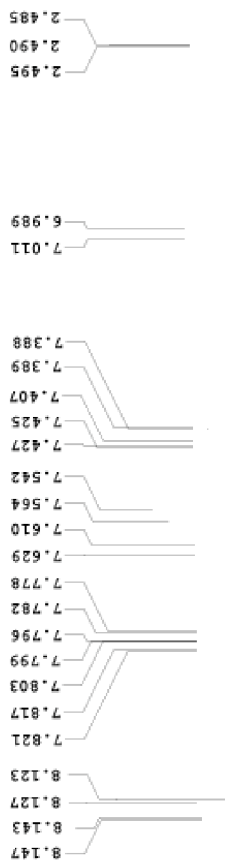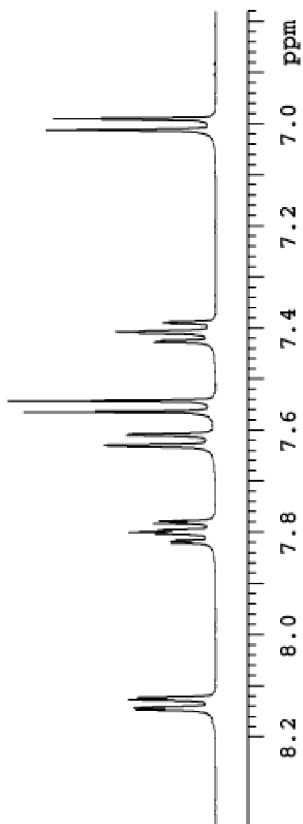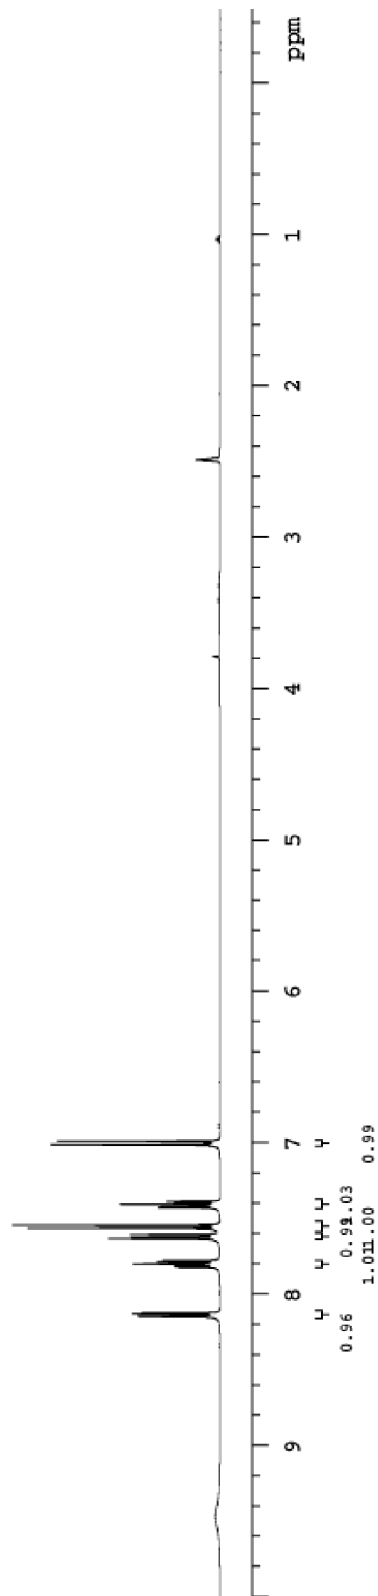

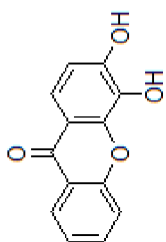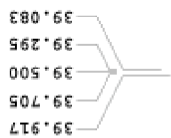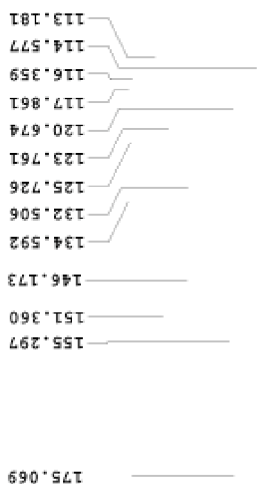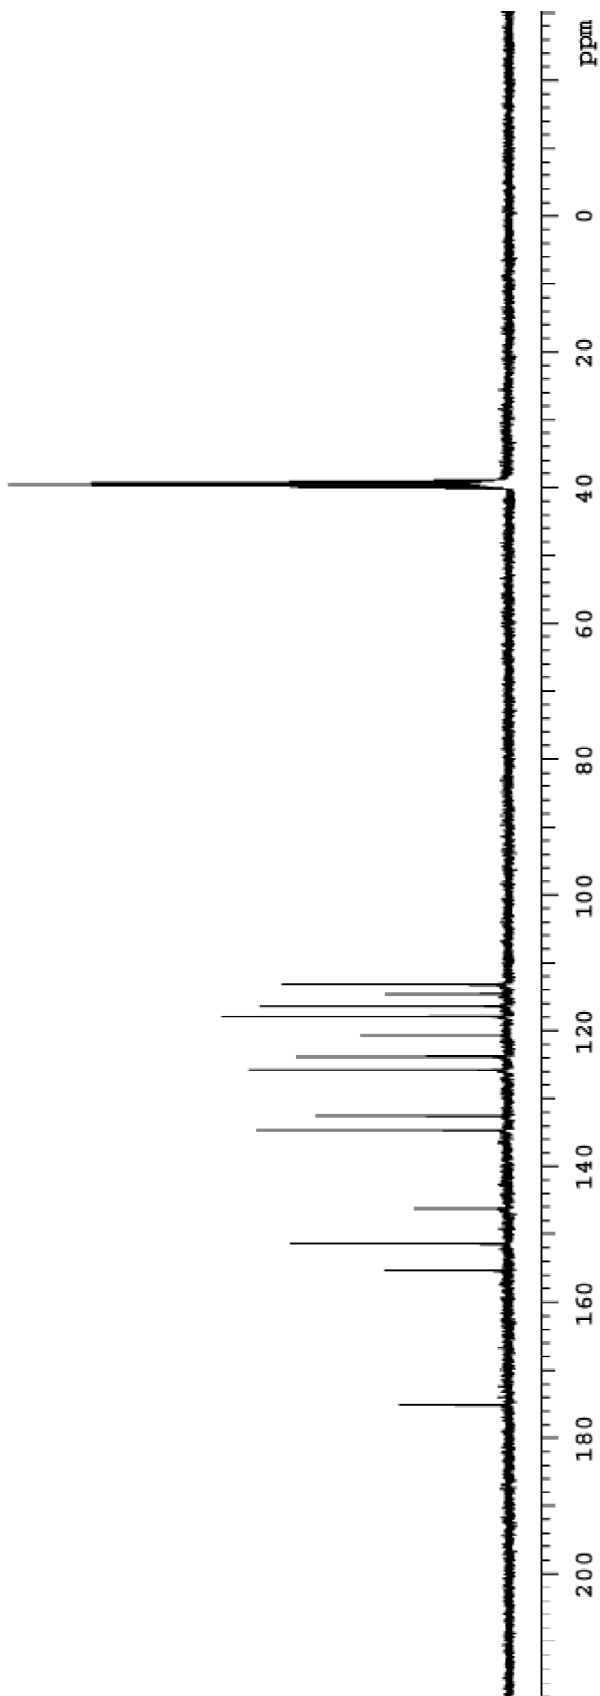

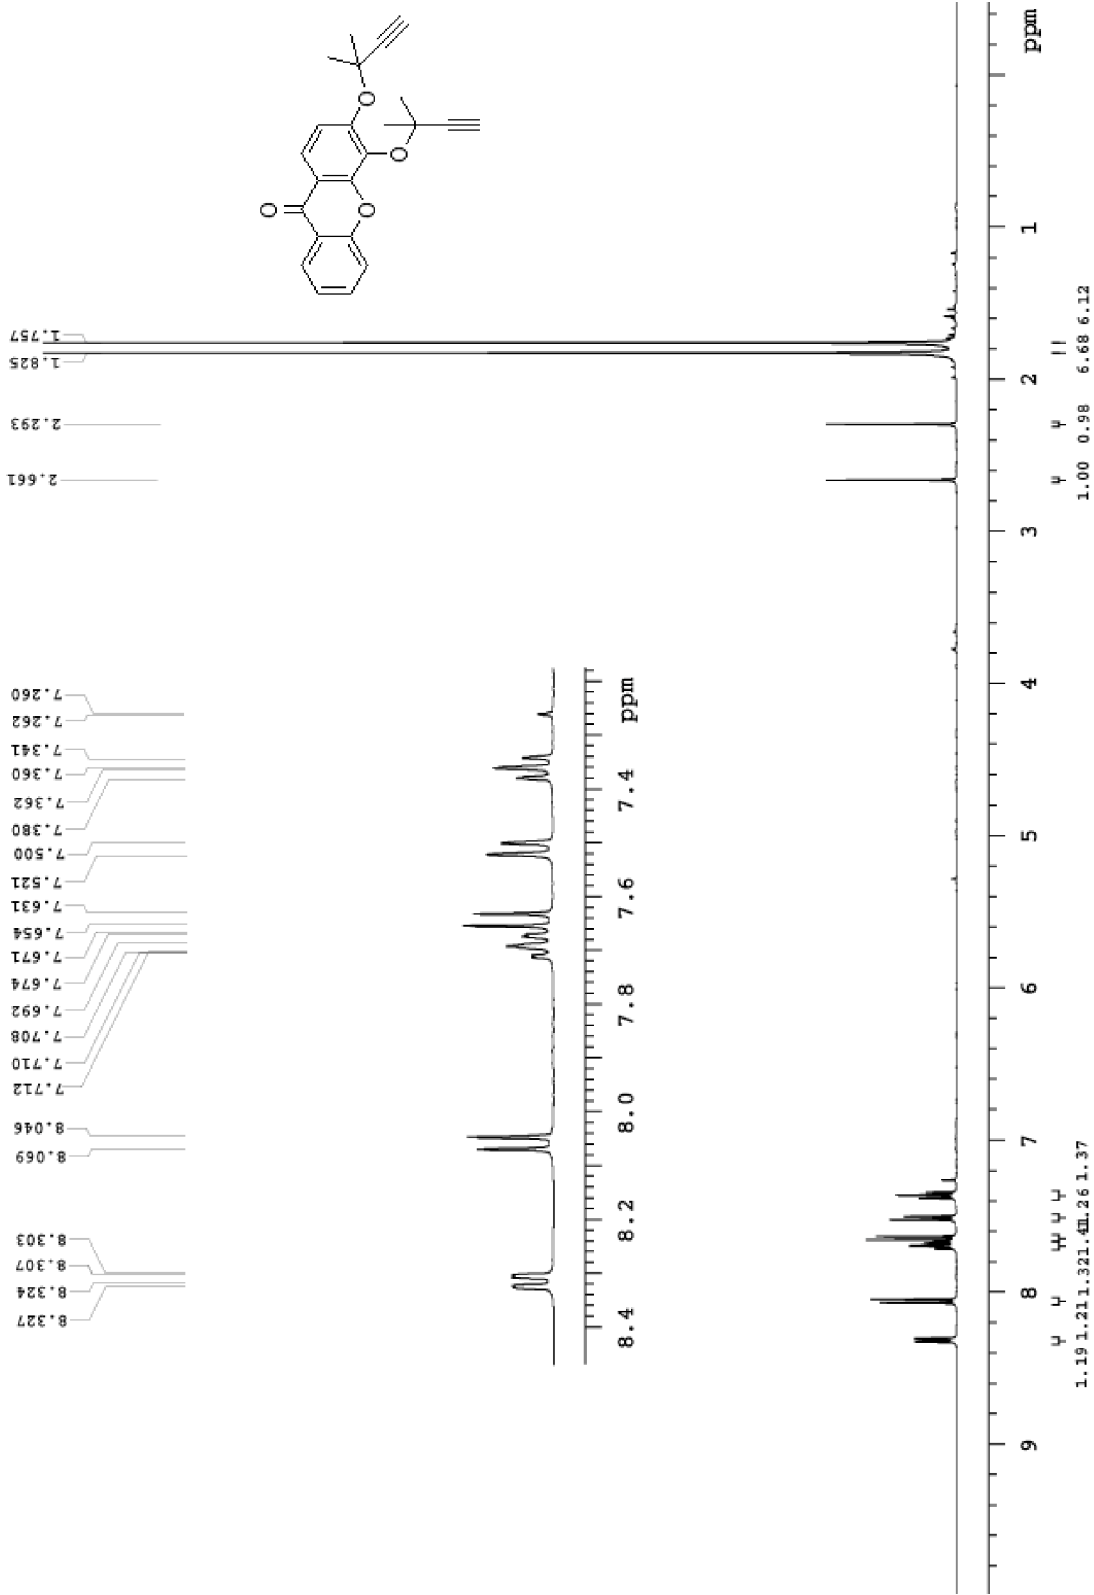

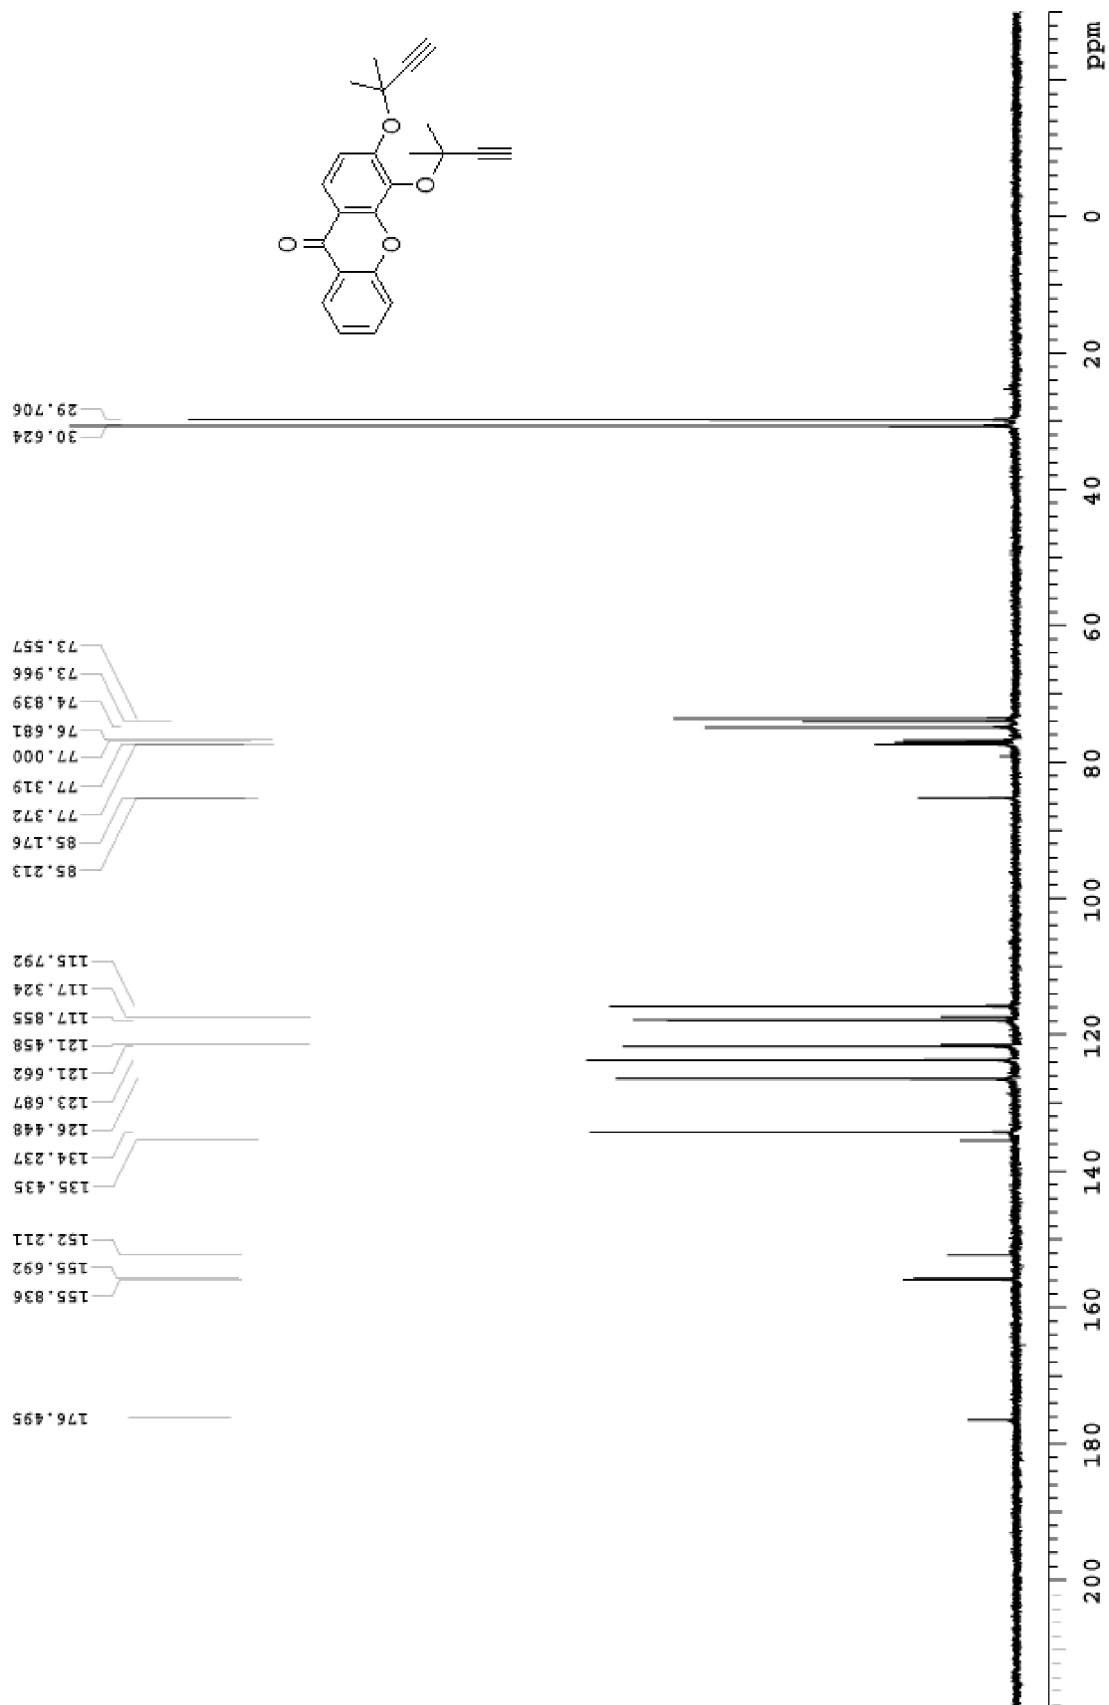

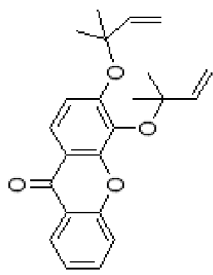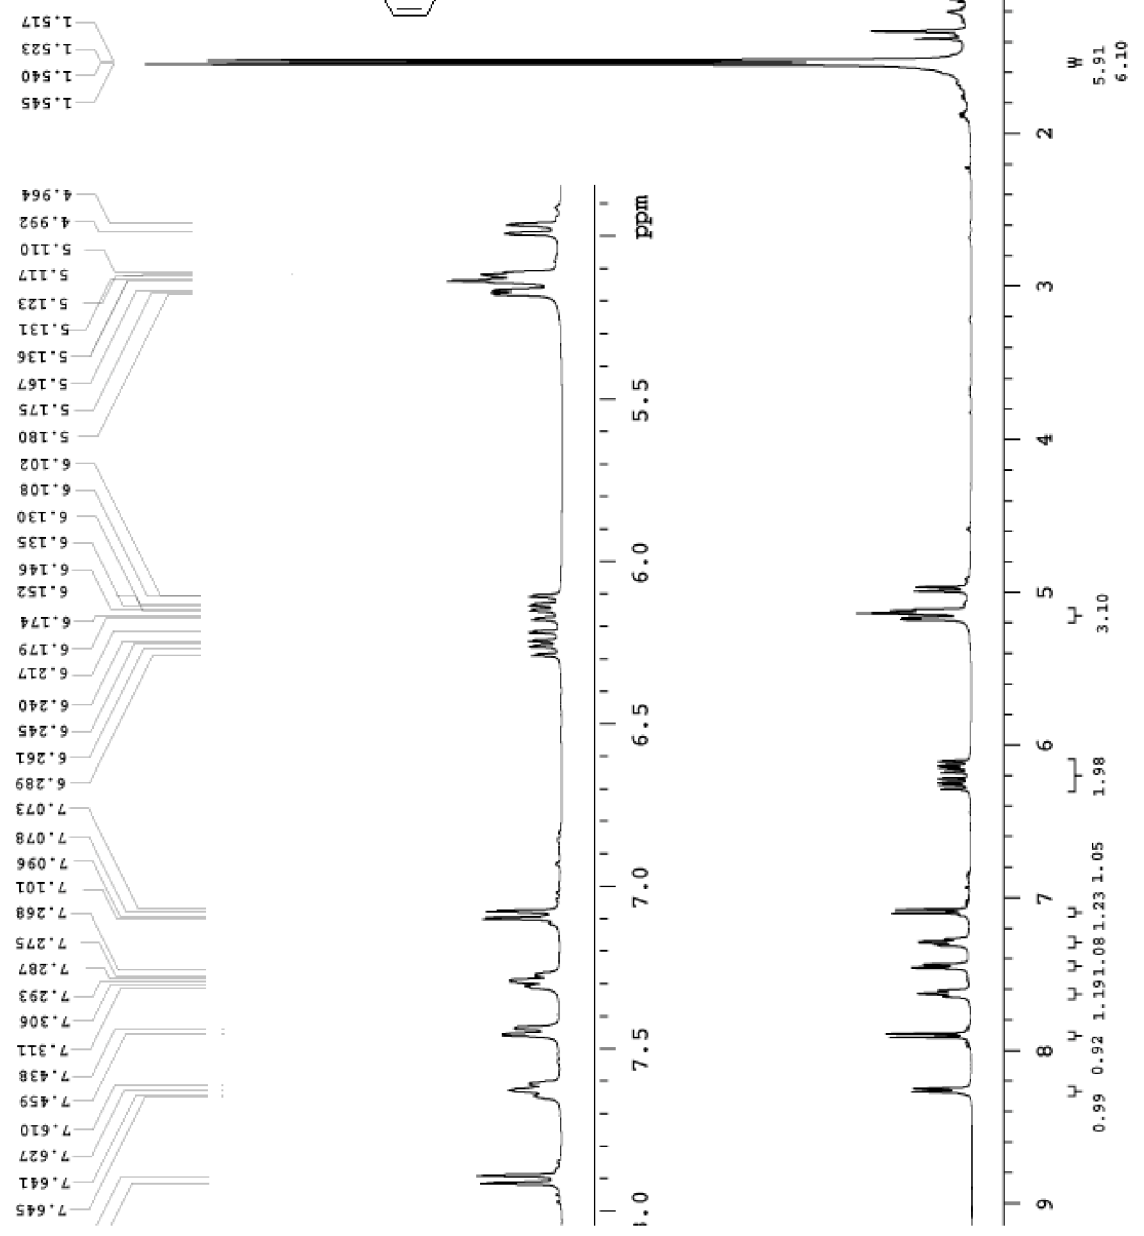



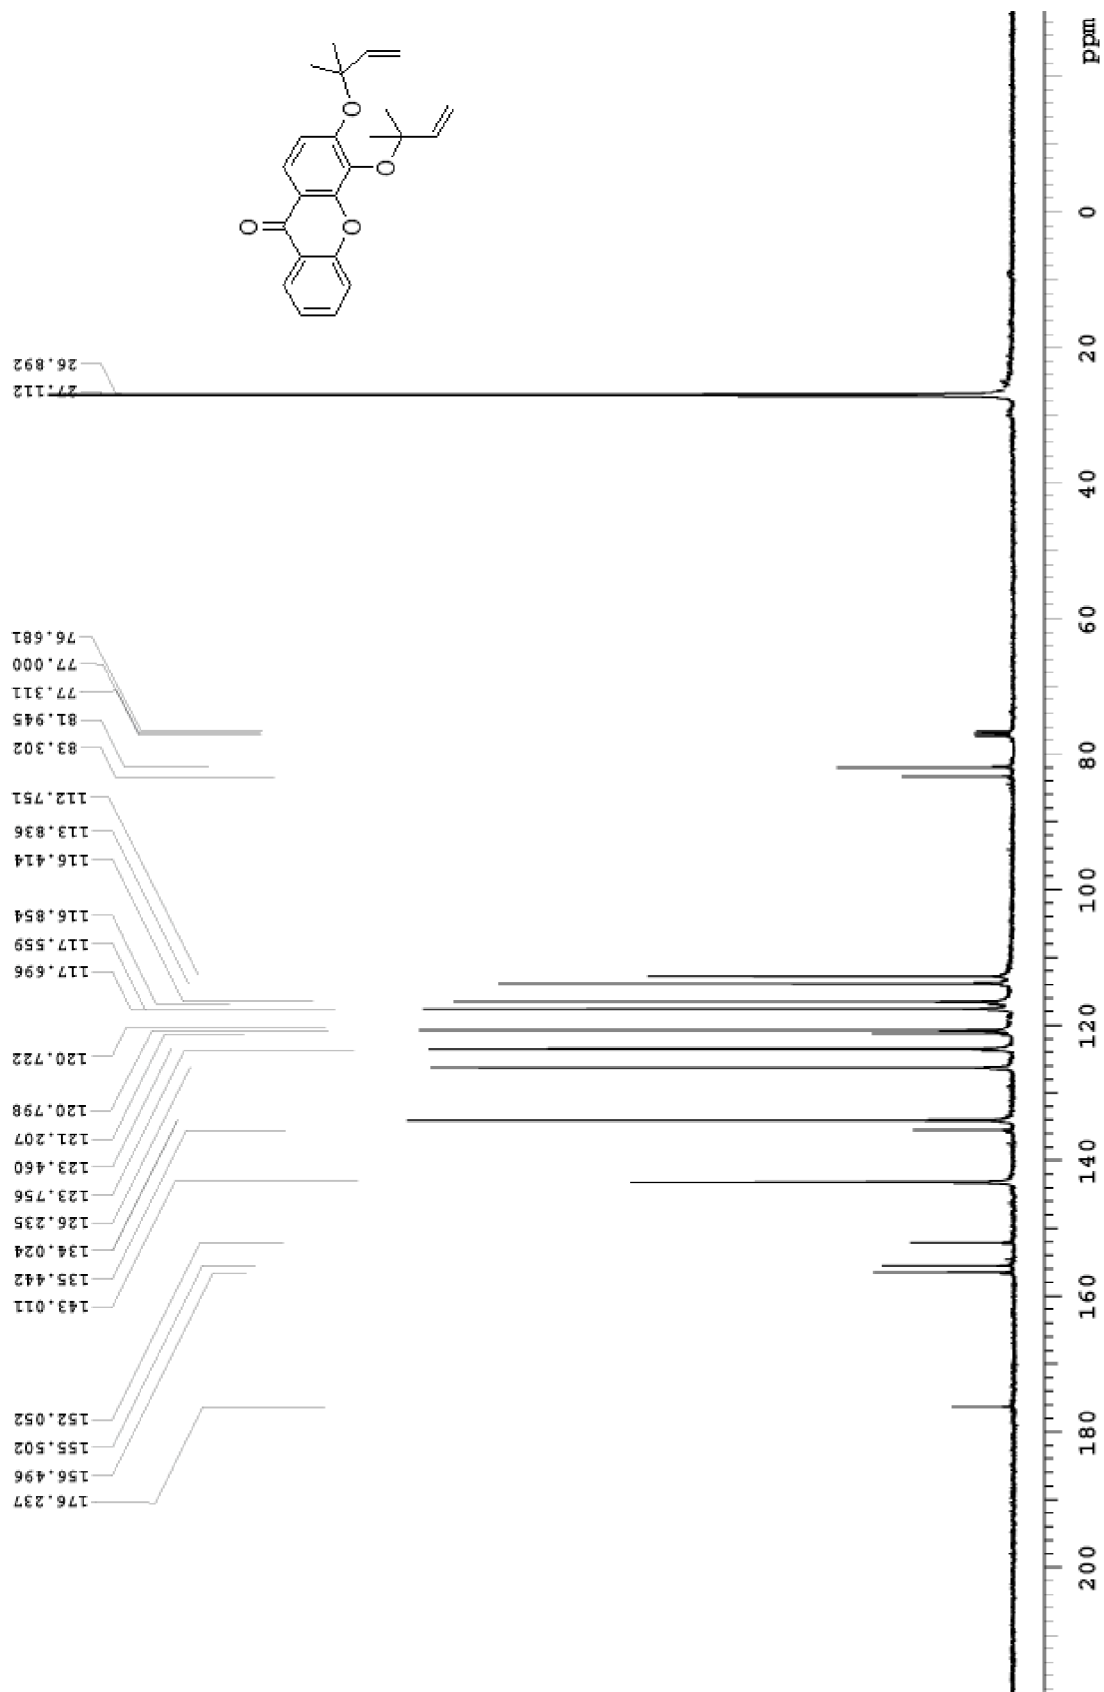

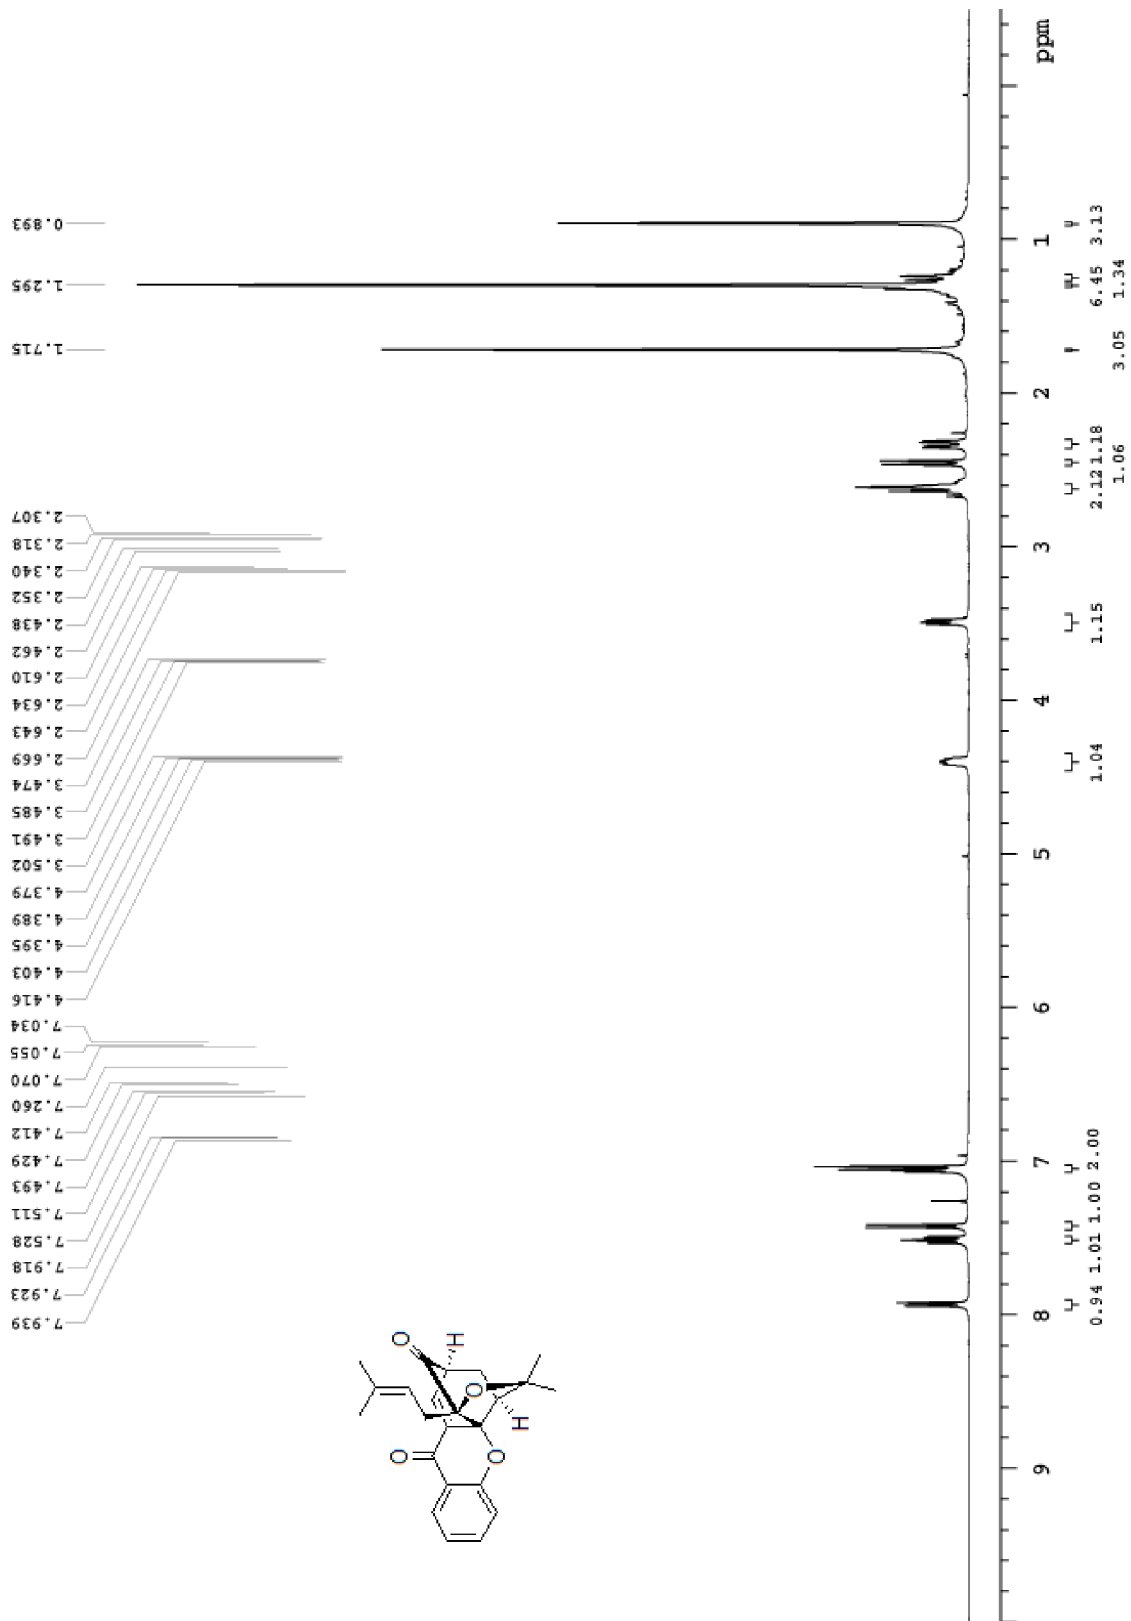

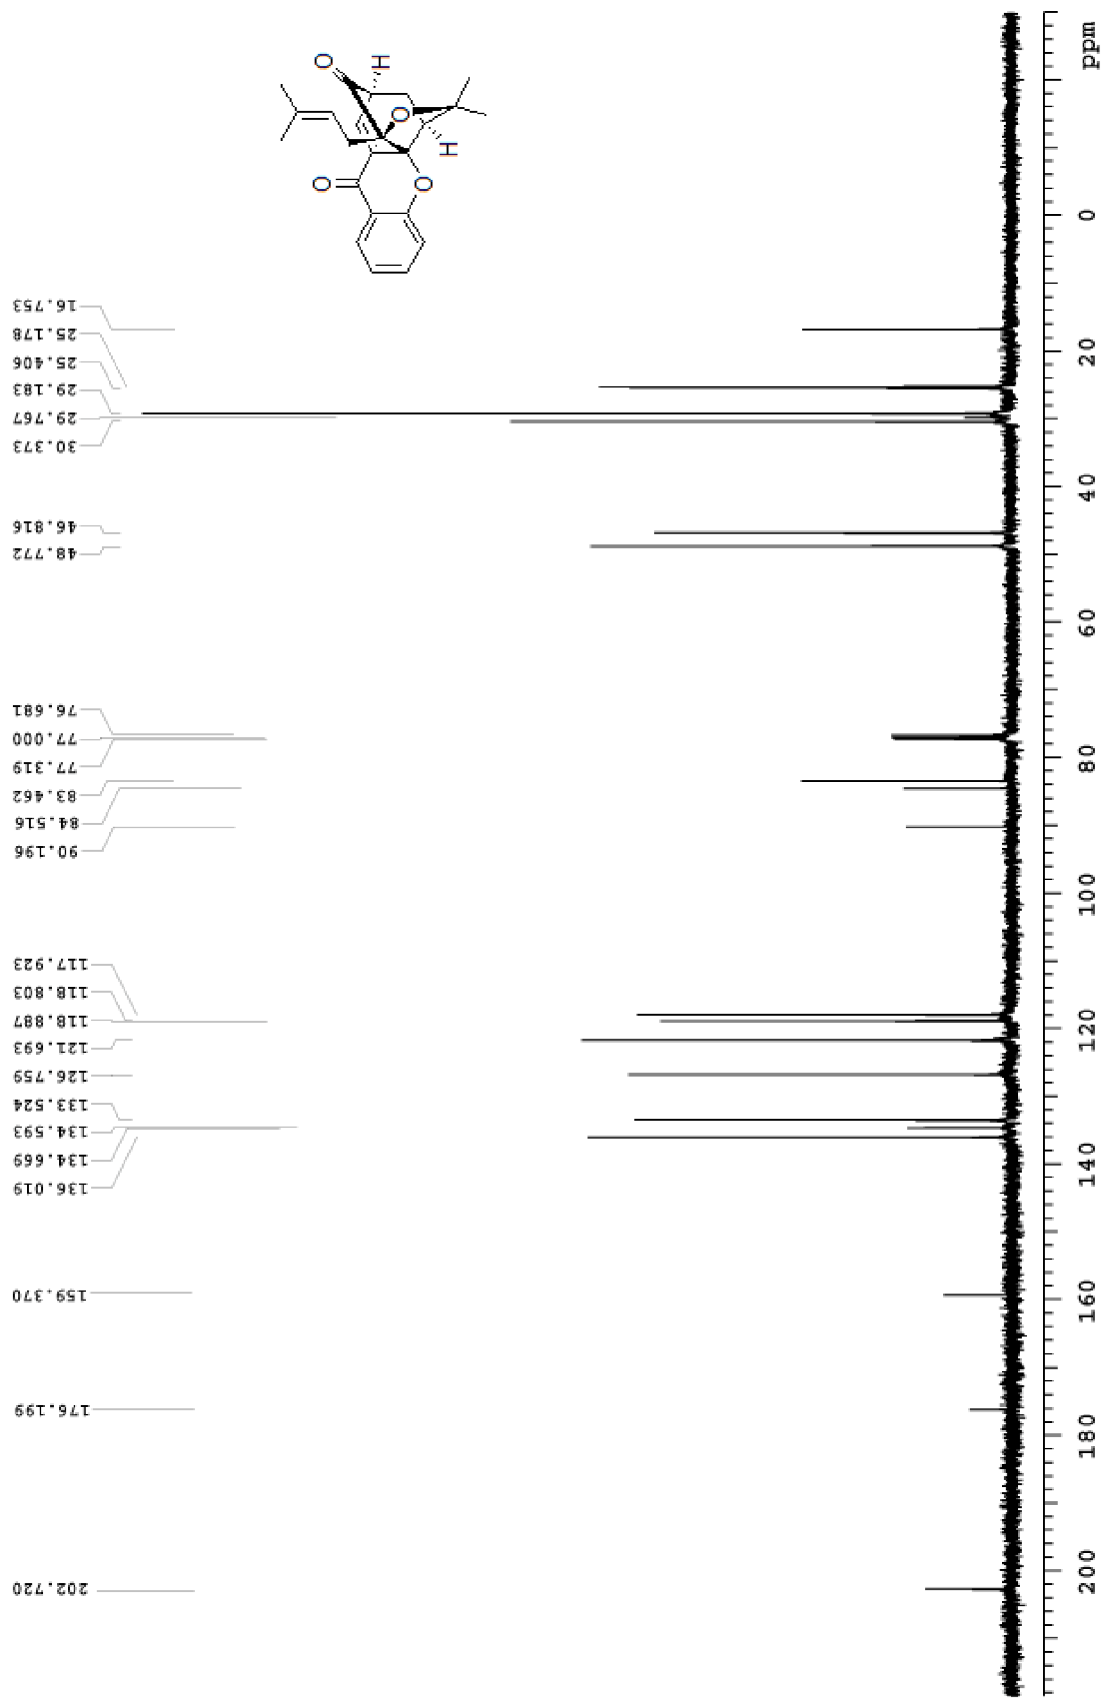



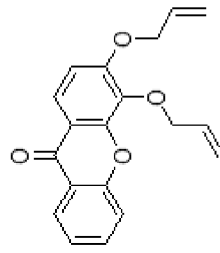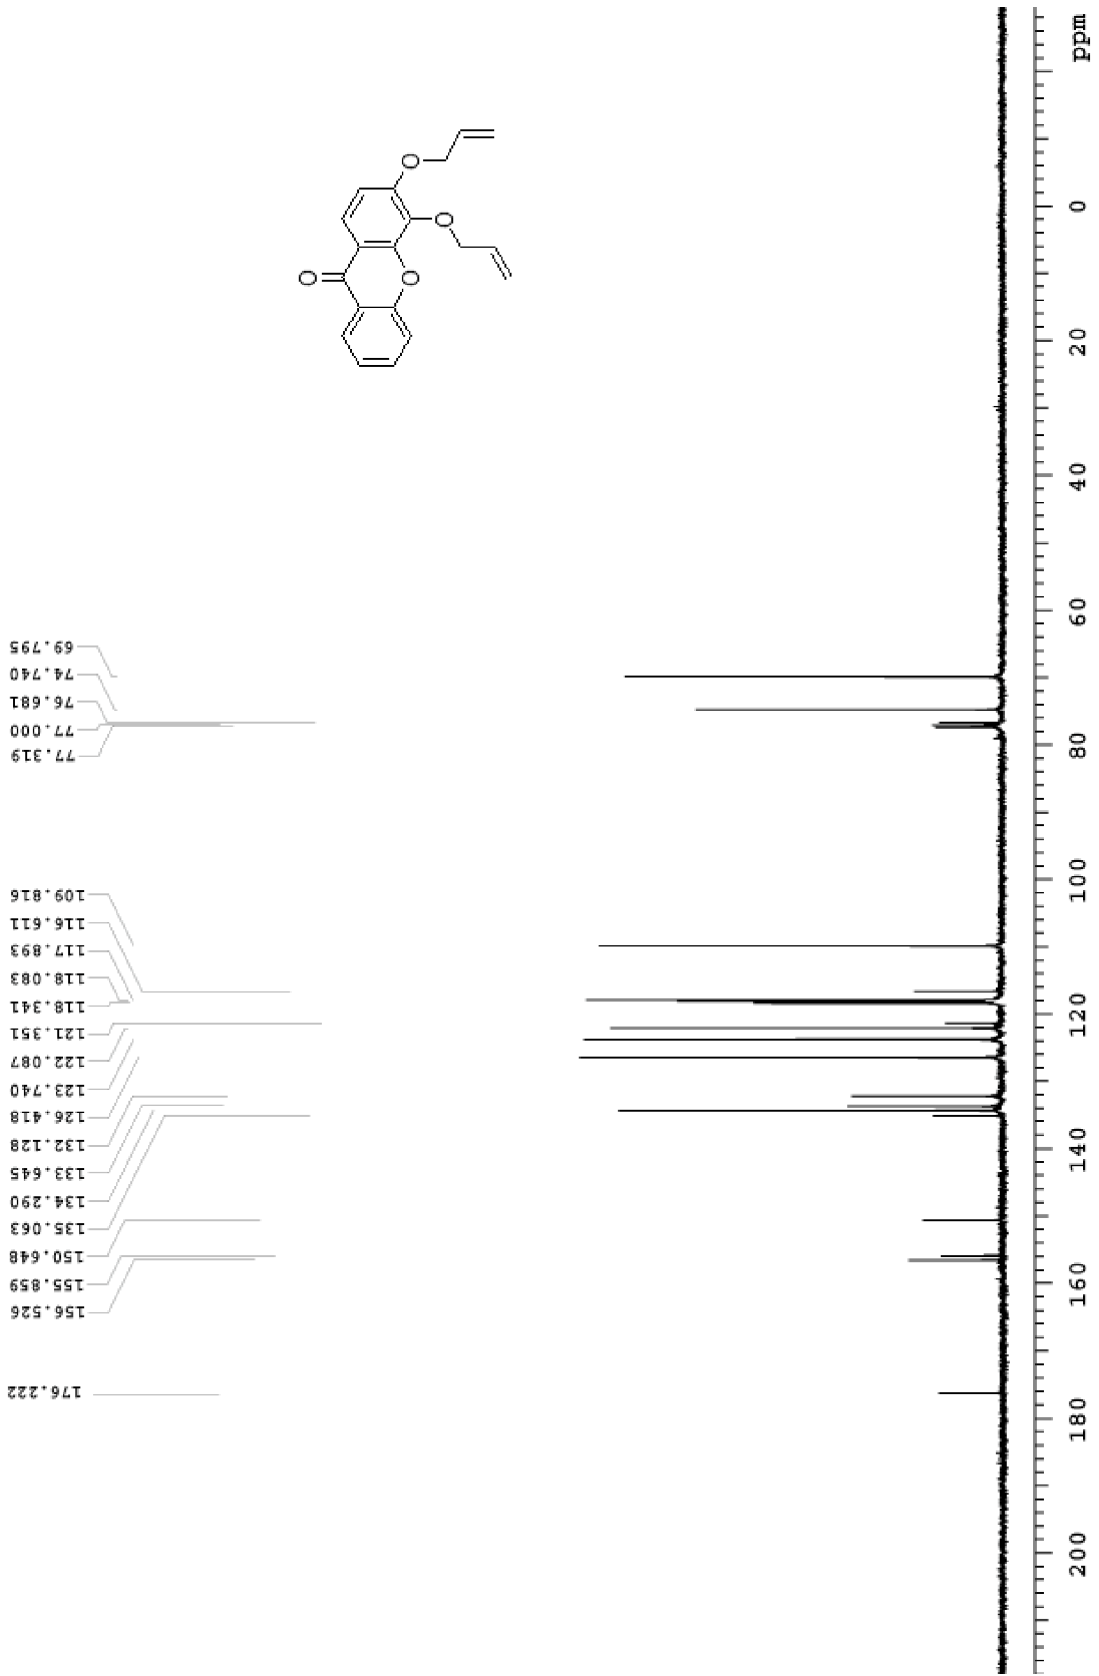

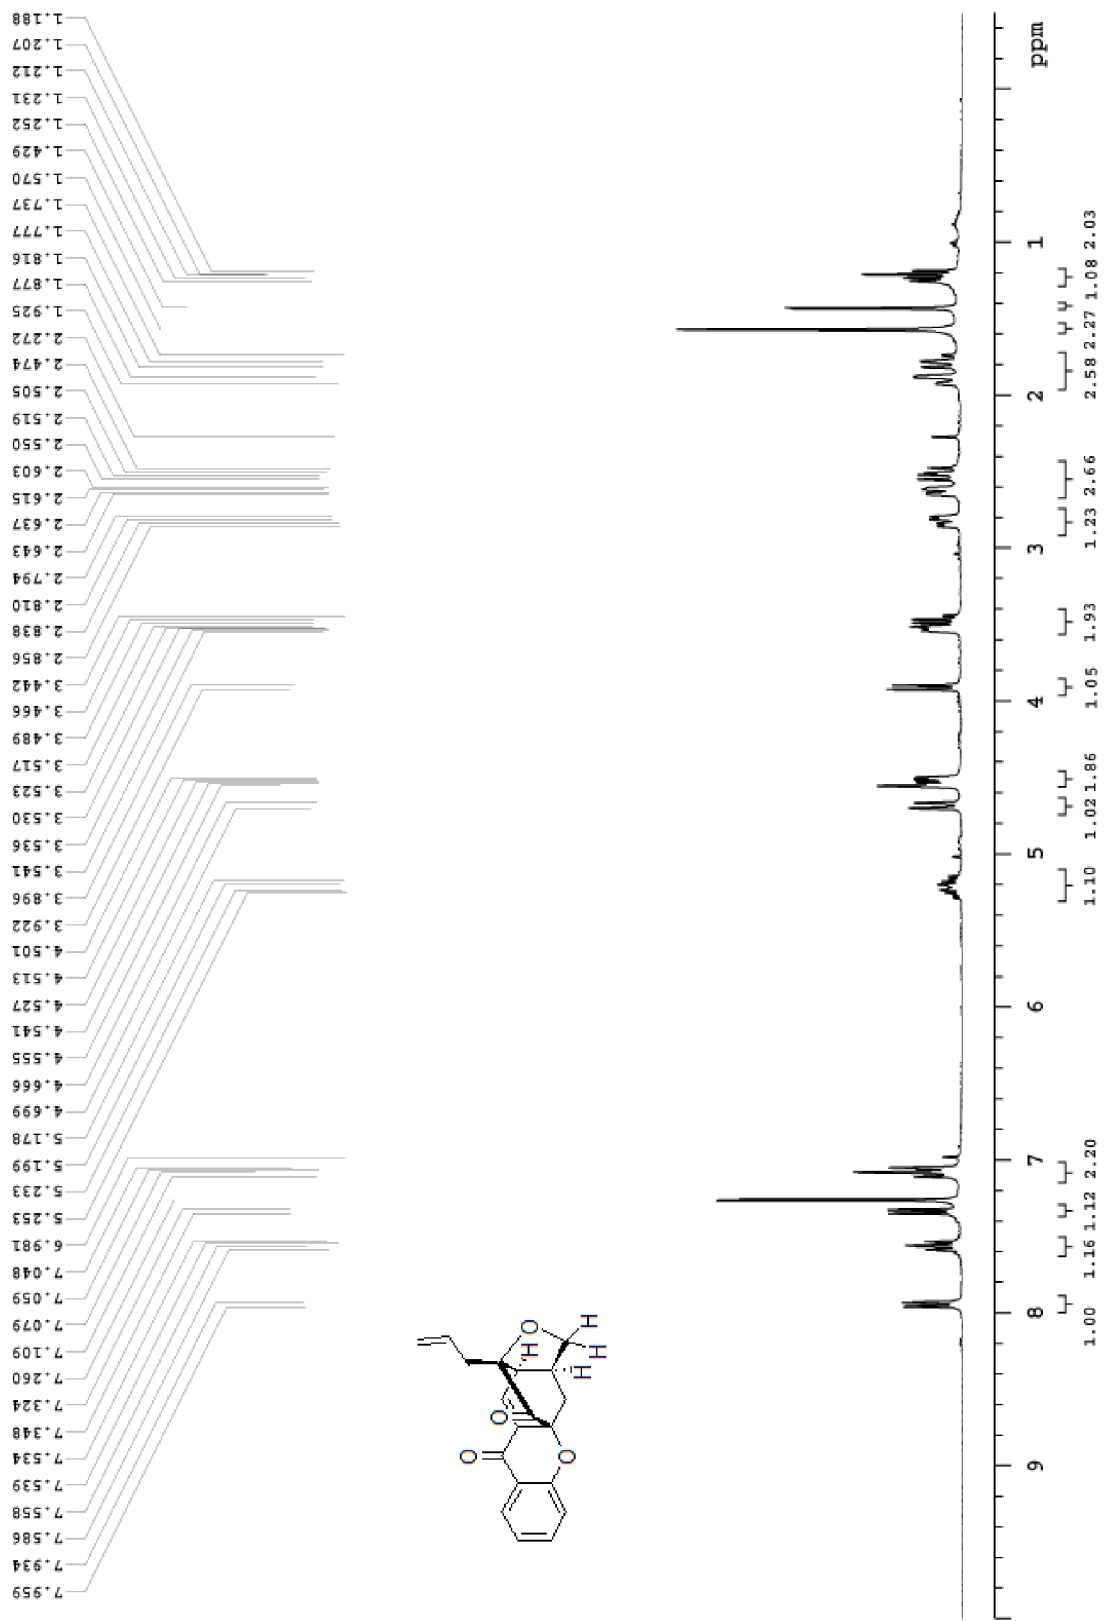

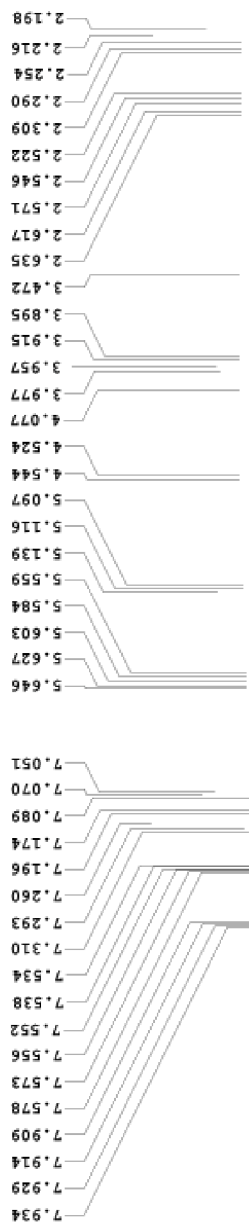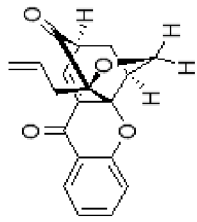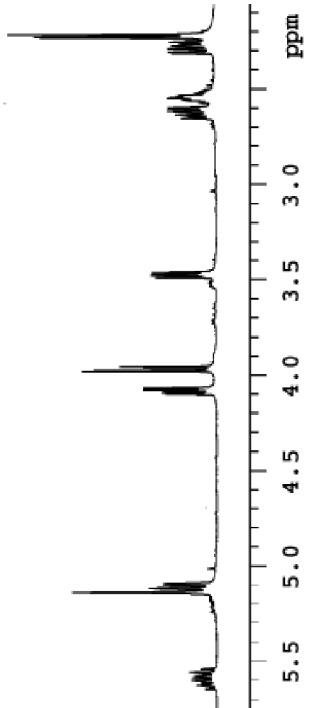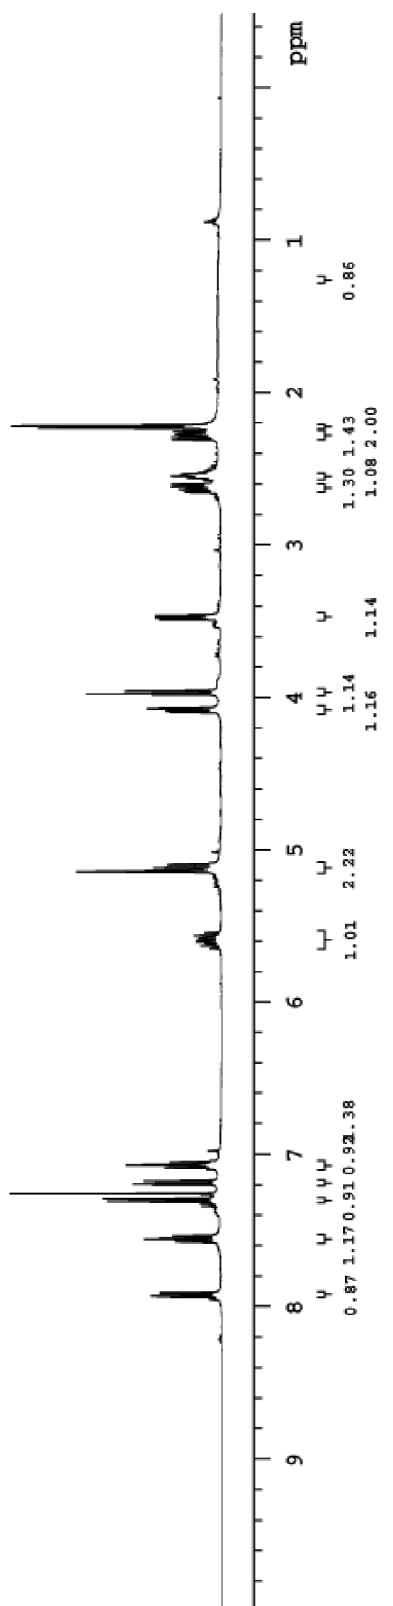

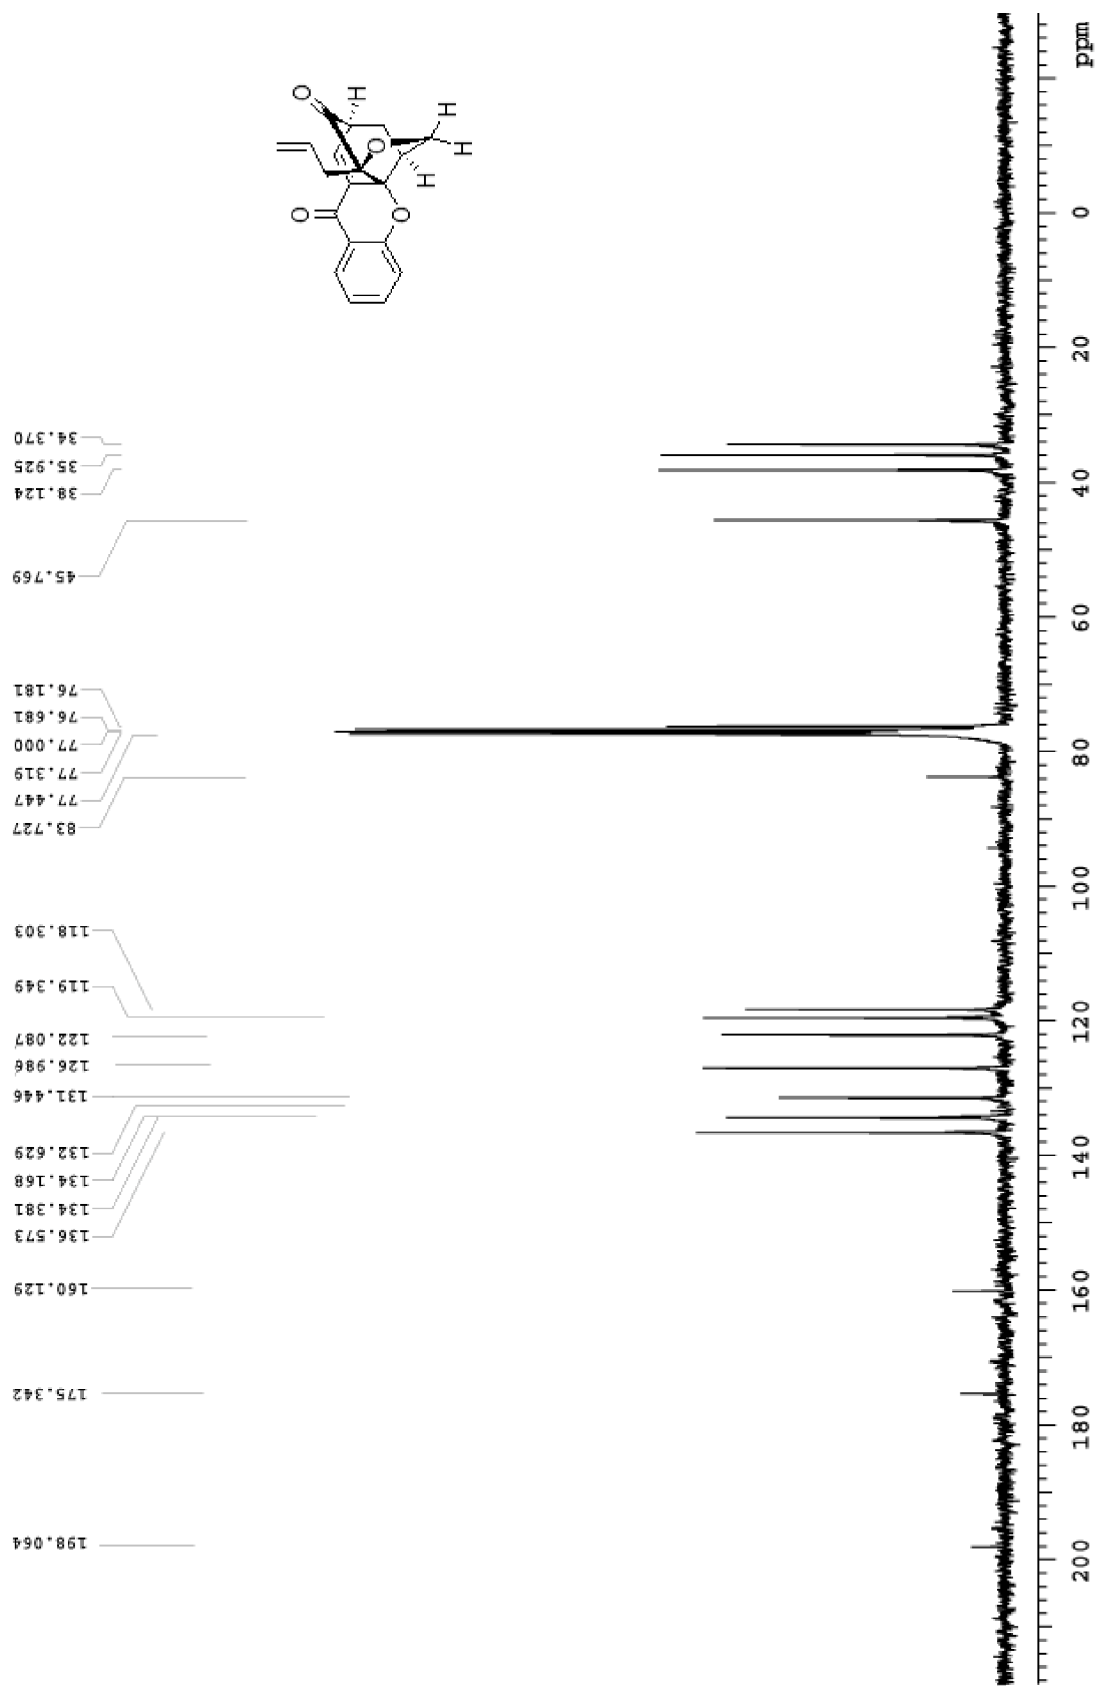

Supplement: b612903j.pdf [file b612903j.pdf]
